# Supplementary material for: Genomes in clinical care
Source: PubMed Central journal article supplement (PMC10940576; doi:10.1038/s41525-024-00402-2), 2024-03-14
Supplement: 41525_2024_402_MOESM1_ESM.pdf [file 41525_2024_402_MOESM1_ESM.pdf]

## Data Analysis

Data analysis was performed via megSAP. Specifics and documentation are located at <https://github.com/imgag/megSAP>

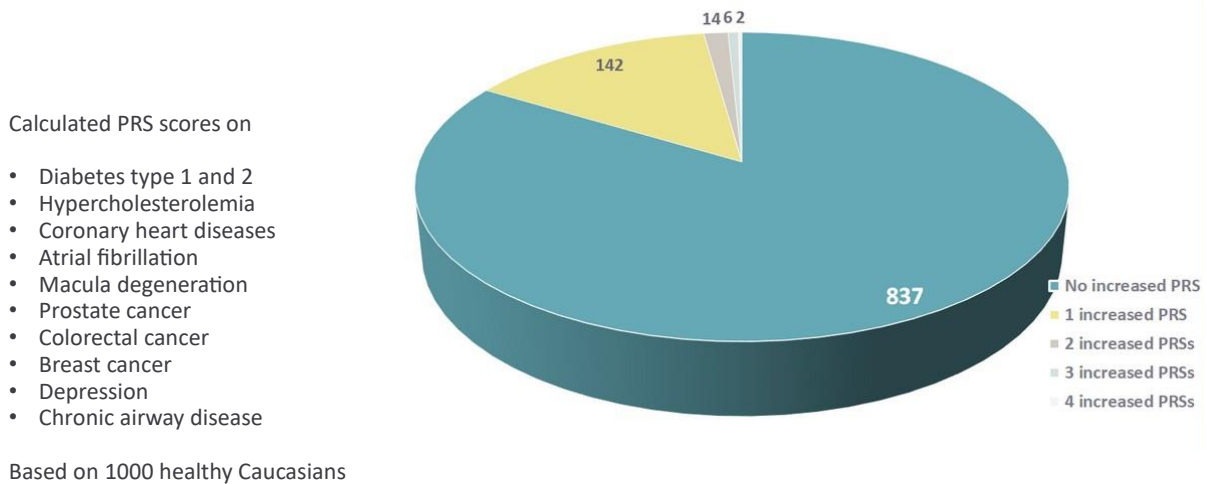

**Suppl. Figure 1: Polygenic risks in a healthy population.** Analysis of 10 different PRS in 1000 unrelated healthy Caucasians from our in-house data base indicating that more than 16% of the population are at higher risk for common polygenic diseases, some of them even for several diseases. The top 5% of the PRS scores were defined as “increased”.

Applied PRS were used from the PGS catalogue as follows:

Diabetes mellitus Type 1: <http://www.pgscatalog.org/publication/PGP000244/>

Diabetes mellitus Type 2: <http://www.pgscatalog.org/publication/PGP000100/>

High cholesterol: <http://www.pgscatalog.org/publication/PGP000244/>

Coronary heart disease: <http://www.pgscatalog.org/publication/PGP000100/>

Atrial fibrillation: <http://www.pgscatalog.org/publication/PGP000100/>

Macular degeneration: <http://www.pgscatalog.org/publication/PGP000263/>

Prostate cancer: <http://www.pgscatalog.org/publication/PGP000100/>

Colorectal cancer: <http://www.pgscatalog.org/publication/PGP000040/>

Breast cancer: <http://www.pgscatalog.org/publication/PGP000002/>

Depression: <http://www.pgscatalog.org/publication/PGP000068/>

Chronic airway obstruction: <http://www.pgscatalog.org/publication/PGP000244/>

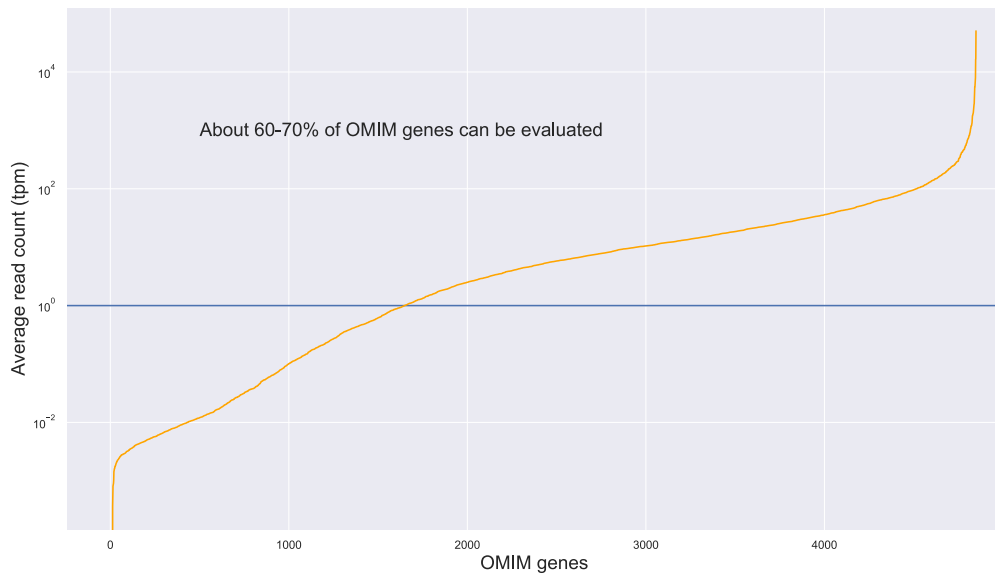

**Suppl. Figure 2: Average gene expression of all OMIM genes in blood.** For each OMIM gene, we counted the normalized number of reads using the tpm metric. (PAX-RNA samples), which pass QC (100M reads, housekeeping 20x coverage >65%) (Orange line)  
Blue line: Threshold expression for covered gene ( $\geq 1$  tpm)

**Suppl. Figure 3: Patient information sheet associated with blood sampling for transcriptome analysis.**

**RNA-Seq data Sheet (English)**

General information on the proband

Sticker with patient information here

|                                              |                                                                                                     |
|----------------------------------------------|-----------------------------------------------------------------------------------------------------|
| <i>Sample</i>                                | <input type="checkbox"/> Pax- tube<br><input type="checkbox"/> other RNA stabilizing tubes          |
| <i>Time of blood sampling (day and time)</i> |                                                                                                     |
| <i>Other Tissue</i>                          |                                                                                                     |
| <i>Infection last week?</i>                  | <input type="checkbox"/> Yes <input type="checkbox"/> No<br>If yes, please specify:                 |
| <i>Vaccination last month</i>                | <input type="checkbox"/> Yes <input type="checkbox"/> No<br>If yes, please specify:                 |
| <i>Any drugs currently taken</i>             | <input type="checkbox"/> Yes <input type="checkbox"/> No<br>If yes, please specify type and amount: |
| <i>Any chronic diseases?</i>                 | <input type="checkbox"/> Yes <input type="checkbox"/> No<br>If yes, please specify:                 |
| <i>Time of last meal</i>                     |                                                                                                     |
| <i>Sport activity on the same day</i>        | <input type="checkbox"/> Yes <input type="checkbox"/> No                                            |
| <i>Smoking</i>                               | <input type="checkbox"/> Yes <input type="checkbox"/> No<br>If yes, how frequent?                   |

Patient's name  
Signature

Medical doctor's name  
Signature
